# Supplementary material for: C. elegans TFIIH subunit GTF-2H5/TTDA is a non-essential transcription factor indispensable for DNA repair
Source: PubMed Central journal article supplement (PMC8617094; doi:10.1038/s42003-021-02875-8), 2021-11-25
Supplement: 42003_2021_2875_MOESM3_ESM.pdf [file 42003_2021_2875_MOESM3_ESM.pdf]

## Description of Additional Supplementary Files

**File name:** Supplementary Data 1

**Description:** Annotated table of proteins identified by mass spectrometry analysis of AG::GTF-2H1 immunoprecipitation in wild type and gtf-2H5 animals.

**File name:** Supplementary Data 2

**Description:** Source data for blot (Fig 1b) and graphs in Figs 1-6.
